# Supplementary material for: A novel bisphenol A electrochemical sensor based on a molecularly imprinted polymer/carbon nanotubes-Au nanoparticles/boron-doped ordered mesoporous carbon composite
Source: Royal Society of Chemistry journal article supplement (doi:10.1039/c8ay01611a), 2018-01-01
Supplement: c8ay01611a1.pdf [file c8ay01611a1.pdf]

**A novel bisphenol A electrochemical sensor based on molecularly imprinted polymer/carbon nanotubes-Au nanoparticles/boron-doped ordered mesoporous carbon composite**

Xiaopeng Hu, Yingying Feng, Hao Wang, Faqiong Zhao, Baizhao Zeng\*

Key Laboratory of Analytical Chemistry for Biology and Medicine (Ministry of Education), College of Chemistry and Molecular Sciences, Wuhan University, Wuhan 430072, Hubei Province, PR China

Corresponding author.

Tel: 86-27-68752701, Fax: 86-27-68754067

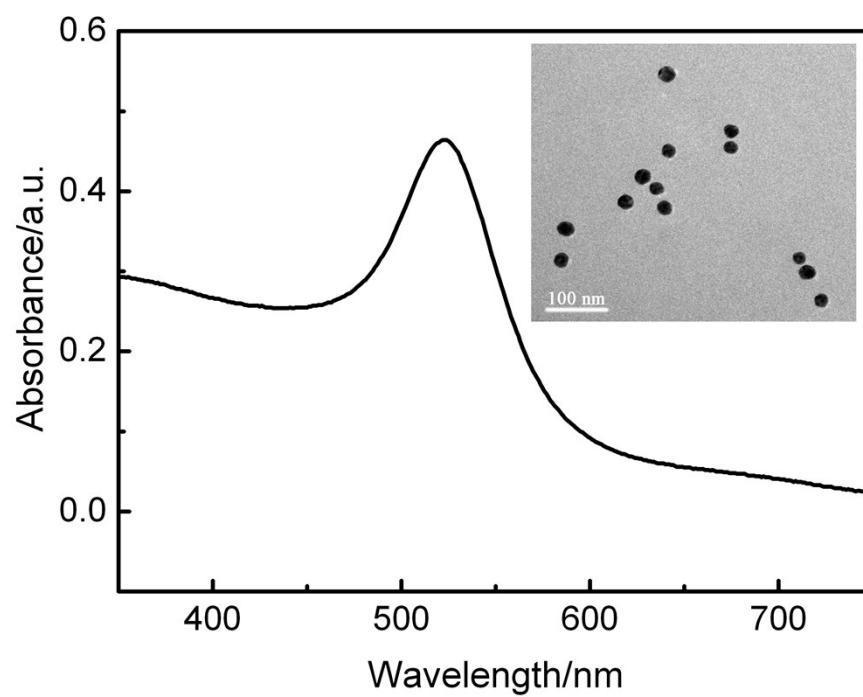

**Fig. S1.** The UV-vis absorption spectrum and the TEM image of the prepared Au NPs.

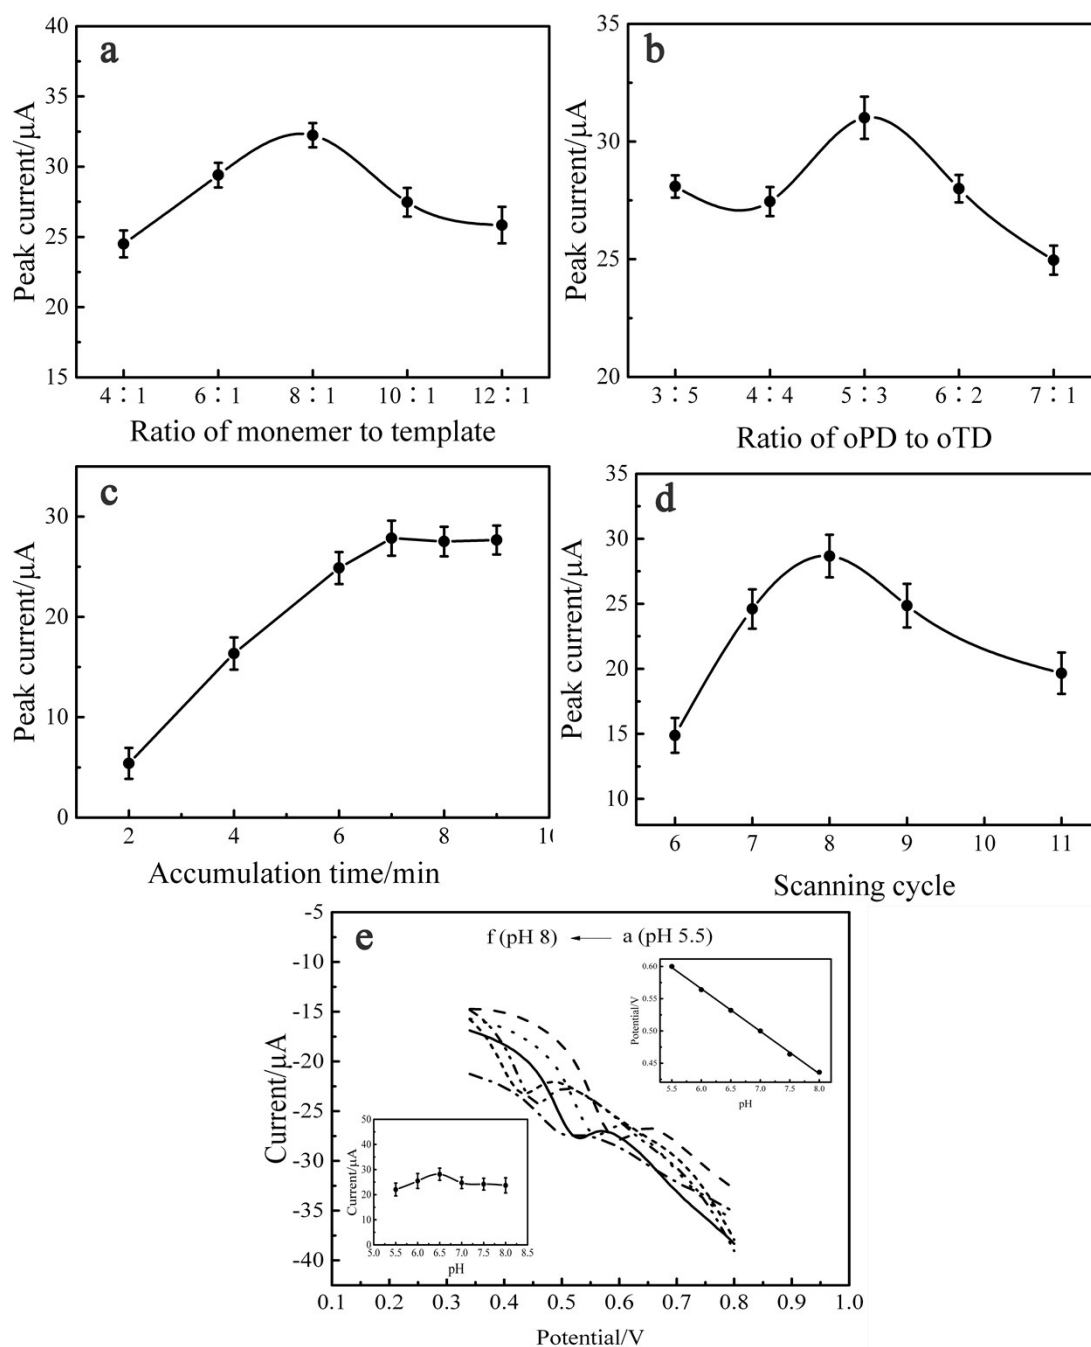

**Fig. S2.** Effects of different conditions on the response of the sensor to BPA: (a) molar ratio of monomer to template, (b) molar ratio of oPD to oTD, (c) accumulation time, (d) number of scanning cycle for electropolymerization, (e) solution pH.

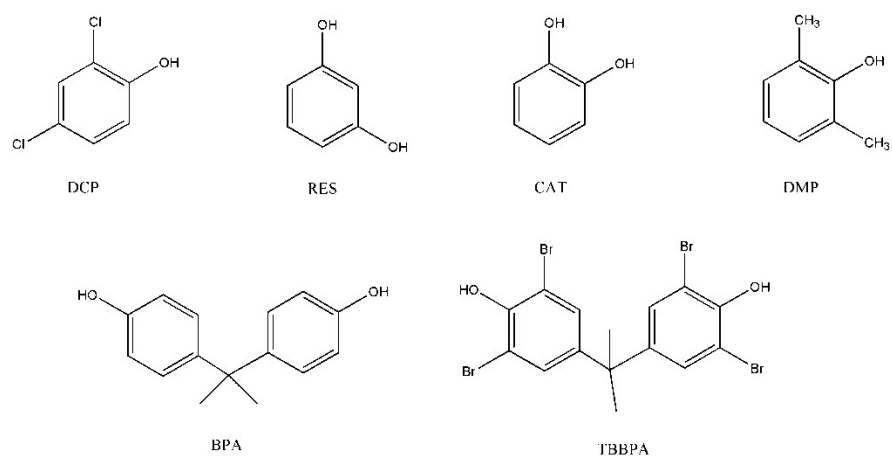

**Fig. S3.** The chemical structural formulas of BPA and its analogs

**Table S1.** Comparison of the performance of the BPA sensor with other reported sensors.

| Sensors                           | Linear ( $\mu\text{M}$ ) | LOD ( $\mu\text{M}$ ) | Reference |
|-----------------------------------|--------------------------|-----------------------|-----------|
| MIPPy/GQDs/GCE                    | 0.1-50                   | 0.04                  | 3         |
| Pt NPs/Gr-CNTs/GCE                | 0.06-10                  | 0.042                 | 30        |
| Magnetic NPs/rGO /GCE             | 0.06-11                  | 0.017                 | 31        |
| SBA-15 molecularly imprinted/ GCE | 0.1-500                  | 0.032                 | 32        |
| MIPs/ MWCNT paste electrode       | 0.08-100                 | 0.022                 | 33        |
| MMIPs NPs/CTAB/CPE                | 0.6-100                  | 0.1                   | 34        |
| MIPs/AuNPs-CNTs-Au NPs/BOMC/GCE   | 0.01-10                  | 0.005                 | This work |

Note: GCE: glassy carbon electrode; MMIP: magnetic molecularly imprinted nanoparticles; CTAB: cetyltrimethyl ammonium bromide; GQDs: graphene quantum dots; Pt NPs: Pt nanoparticles; Gr-CNTs: graphene-carbon nanotubes; CPE: carbon paste electrode; CNTs: multiwalled carbon nanotubes; rGO: reduced graphene oxide.

**Table S2.**Determination results of BPA in real samples using the proposed method.

| Samples | Added<br>( $\mu\text{M}$ ) | BPA detected<br>( $\mu\text{M}$ ) | Recovery<br>(%) | RSD ( $n=5$ )<br>(%) |
|---------|----------------------------|-----------------------------------|-----------------|----------------------|
| Milk 1  | 0                          | 0                                 | —               | —                    |
|         | 1                          | 1.07                              | 107             | 4.6                  |
|         | 7                          | 6.88                              | 98.2            | 3.9                  |
| Milk 2  | 0                          | 0                                 | —               | —                    |
|         | 1                          | 1.02                              | 102             | 4.4                  |
|         | 7                          | 6.87                              | 98.1            | 4.2                  |
| Milk 3  | 0                          | 0                                 | —               | —                    |
|         | 1                          | 0.98                              | 98              | 4.9                  |
|         | 7                          | 7.11                              | 101.5           | 4.8                  |
